# Supplementary material
Source: PubMed Central journal article supplement (PMC6537785)
Supplement: jamasurg-154-421-s001.pdf [file jamasurg-154-421-s001.pdf]

## Supplementary Online Content

van Rein EAJ, van der Sluijs R, Voskens FJ, et al. Development and validation of a prediction model for prehospital triage of trauma patients. *JAMA Surg*. Published online February 6, 2019. doi:10.1001/jamasurg.2018.4752

**eMethods.** The National Field Triage Protocol of the Netherlands

This supplementary material has been provided by the authors to give readers additional information about their work.

# Appendix 1. The National field triage protocol of the Netherlands

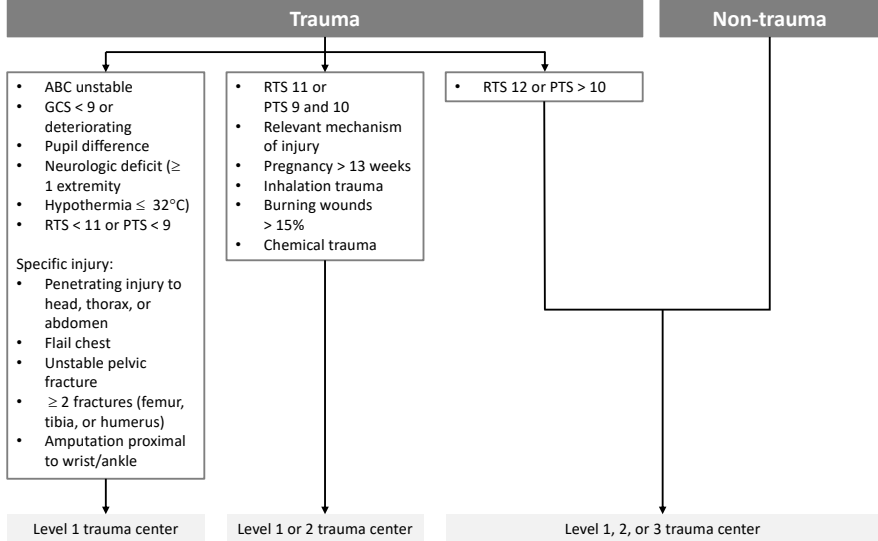

GCS: Glasgow Coma Scale, RTS: Revised Trauma Score, PTS: Pediatric Trauma
